# Supplementary material for: The fate of fipronil in modular estuarine mesocosmsElectronic supplementary information (ESI) available: table of GC-ECD and GC-ITMS retention times, RT, for fipronil analytes; mass spectra of fipronil, fipronil desulfinyl, fipronil sulfide, fipronil sulfone and fipronil amide; and aqueous product distribution of fipronil in estuarine mesocosms over the experimental timescale. See http://www.rsc.org/suppdata/em/b3/b307304a/
Source: Royal Society of Chemistry journal article supplement (doi:10.1039/b307304a), 2004-01-01
Supplement: b307304atable.pdf [file b307304atable.pdf]

| Analyte                               | R <sub>T</sub> - STD (min)<br>GC-ECD | R <sub>T</sub> - EXP (min)<br>GC-ECD |
|---------------------------------------|--------------------------------------|--------------------------------------|
| 4-bromoanisole<br>(internal std.)     | 3.53 ± 0.02                          | 3.51 ± 0.03                          |
| fipronil desulfinyl ( <u>2</u> )      | 11.12 ± 0.01                         | 11.13 ± 0.03                         |
| fipronil sulfide ( <u>3</u> )         | 12.54 ± 0.03                         | 12.55 ± 0.04                         |
| fipronil ( <u>1</u> )                 | 12.74 ± 0.03                         | 12.72 ± 0.03                         |
| fipronil sulfone ( <u>4</u> )         | 13.78 ± 0.02                         | 13.79 ± 0.02                         |
| endosulfan sulfate<br>(external std.) | 15.03 ± 0.03                         | 15.04 ± 0.04                         |
| fipronil amide ( <u>5</u> )           | 15.42 ± 0.03                         | 15.41 ± 0.02                         |
| mirex<br>(recovery std.)              | 17.04 ± 0.02                         | 17.04 ± 0.03                         |

| Analyte                               | R <sub>T</sub> - STD (min)<br>GC-ITMS | R <sub>T</sub> - EXP (min)<br>GC-ITMS |
|---------------------------------------|---------------------------------------|---------------------------------------|
| fipronil desulfinyl ( <u>2</u> )      | 7.39 ± 0.03                           | 7.40 ± 0.03                           |
| fipronil sulfide ( <u>3</u> )         | 8.78 ± 0.02                           | 8.77 ± 0.03                           |
| fipronil ( <u>1</u> )                 | 8.98 ± 0.03                           | 8.97 ± 0.02                           |
| fipronil sulfone ( <u>4</u> )         | 10.09 ± 0.02                          | 10.09 ± 0.02                          |
| endosulfan sulfate<br>(external std.) | 11.33 ± 0.03                          | 11.34 ± 0.03                          |
| fipronil amide ( <u>5</u> )           | 11.77 ± 0.01                          | 11.75 ± 0.02                          |
| mirex<br>(recovery std.)              | 13.40 ± 0.01                          | 13.38 ± 0.03                          |

**Sup. Table 1.** GC-ECD and GC-ITMS retention times, R<sub>T</sub>, of fipronil analytes.
