# Supplementary figures and images for: The fate of fipronil in modular estuarine mesocosmsElectronic supplementary information (ESI) available: table of GC-ECD and GC-ITMS retention times, RT, for fipronil analytes; mass spectra of fipronil, fipronil desulfinyl, fipronil sulfide, fipronil sulfone and fipronil amide; and aqueous product distribution of fipronil in estuarine mesocosms over the experimental timescale. See http://www.rsc.org/suppdata/em/b3/b307304a/
Source: Royal Society of Chemistry journal article supplement (doi:10.1039/b307304a), 2004-01-01

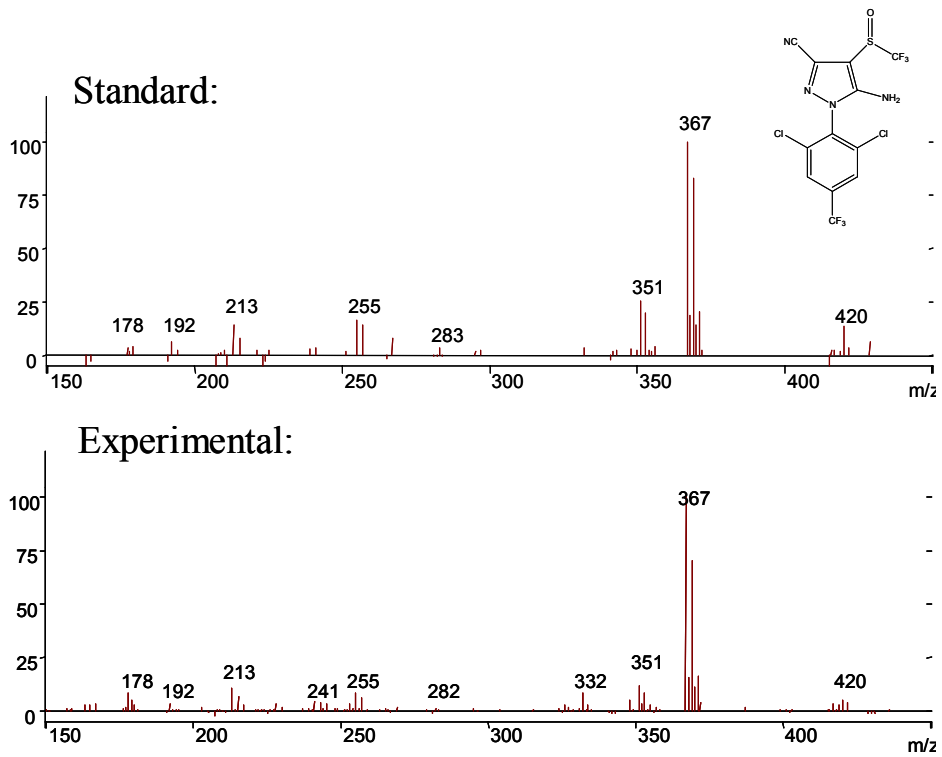

**Sup. Figure 1.** Mass spectra of fipronil

Supplement: b307304afig1.pdf [file b307304afig1.pdf]

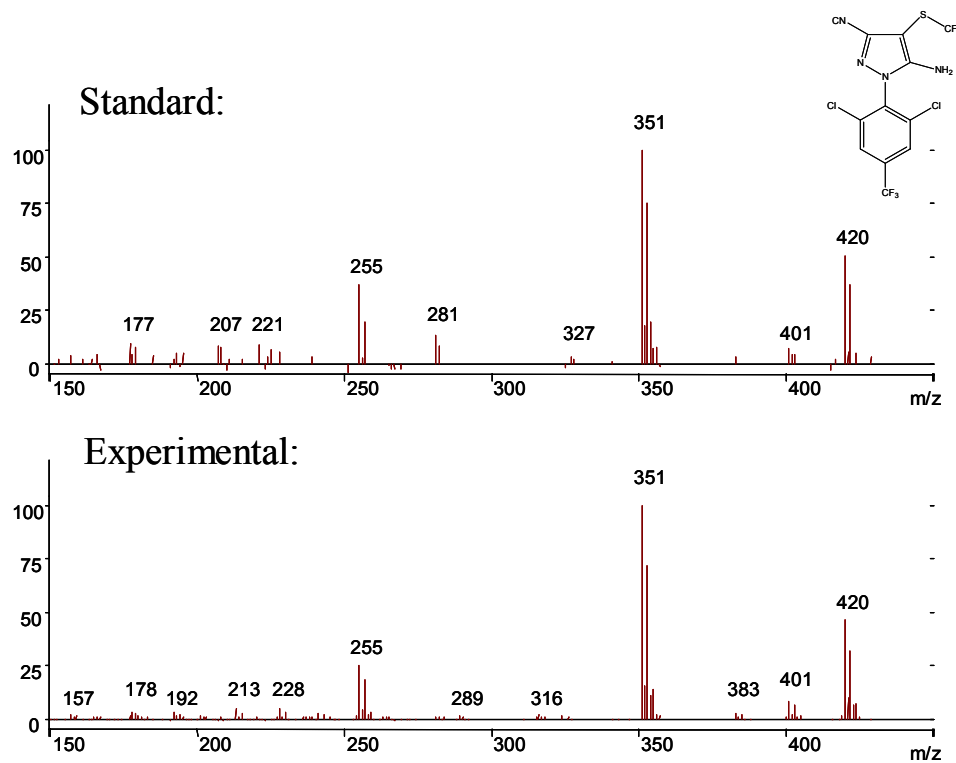

**Sup. Figure 3.** Mass spectra of fipronil sulfide.

Supplement: b307304afig3.pdf [file b307304afig3.pdf]

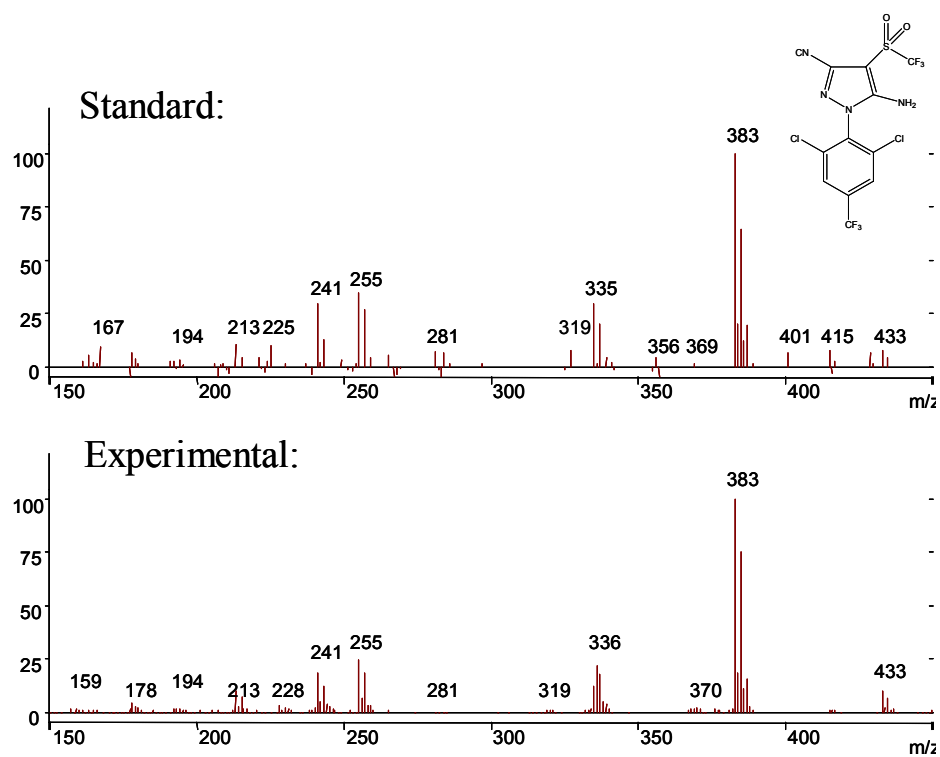

**Sup. Figure 4.** Mass spectra of fipronil sulfone

Supplement: b307304afig4.pdf [file b307304afig4.pdf]

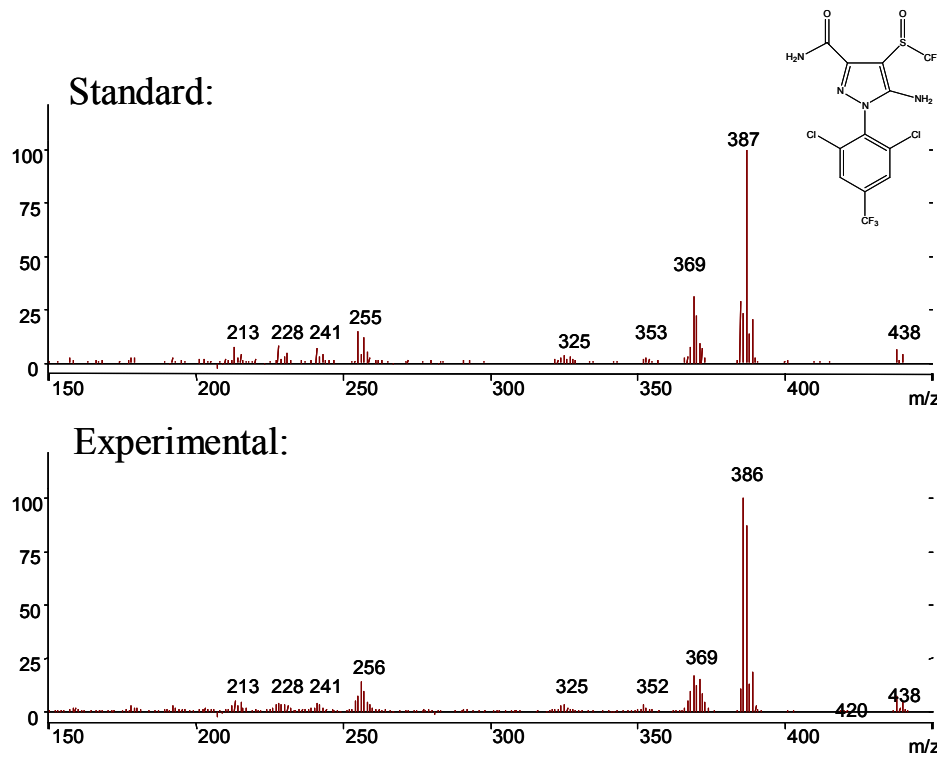

**Sup. Figure 5.** Mass spectra of fipronil amide

Supplement: b307304afig5.pdf [file b307304afig5.pdf]
